# Supplementary material
Source: publisher figshare collection journal article supplement (https://tandf.figshare.com/articles/dataset/_/9221954)
Supplement: Supplementary file 3 [file 2]

#### Appendix D: Characteristics of the participants.

|     | Participant type                   | Age | Gender | Ethnicity     | Education level            | Number of years in the SMNDRAG | Communication difficulties |
|-----|------------------------------------|-----|--------|---------------|----------------------------|--------------------------------|----------------------------|
| P1  | PwMND                              | 50s | Female | White British | Masters degree             | 3                              | No <sup>a</sup>            |
| P2  | SITraN employee/relative           | 30s | Female | White British | Doctor of Philosophy       | 7                              | No                         |
| P3  | MND Association volunteer          | 50s | Female | White British | Masters degree             | 7                              | No                         |
| P4  | Ex-carer/relative                  | 80s | Male   | White British | Undergraduate degree       | 7                              | No                         |
| P5  | SITraN employee                    | 40s | Female | White British | Masters degree             | 7                              | No                         |
| P6  | MND Association volunteer/ex-carer | 80s | Female | White British | Undergraduate degree       | 7                              | No                         |
| P7  | Ex-carer/relative                  | 40s | Female | White British | Professional qualification | 6                              | No                         |
| P8  | PwMND                              | 50s | Female | White British | Undergraduate degree       | 3                              | No                         |
| P9  | MND Association volunteer          | 50s | Female | White British | Professional qualification | 7                              | No                         |
| P10 | Ex-carer/relative                  | 70s | Male   | White British | Professional qualification | 7                              | No                         |
| P11 | Researcher                         | 40s | Male   | White French  | Doctor of Philosophy       | N/A                            | No                         |
| P12 | Researcher                         | 40s | Male   | White British | Doctor of Philosophy       | N/A                            | No                         |
| P13 | Researcher                         | 30s | Male   | White British | Doctor of Philosophy       | N/A                            | No                         |

<sup>a</sup> *This participant used voice recognition software to use electrical devices*

SMNDRAG, Sheffield Motor Neurone Disorders Research Advisory Group

PwMND, person with motor neuron disease

SITraN, Sheffield Institute for Translational Neuroscience

MND, motor neuron disease
