# Supplementary material
Source: publisher figshare collection journal article supplement (https://tandf.figshare.com/articles/dataset/_/9221954)
Supplement: Supplementary file 4 [file 2]

Archive with 5 entries (5 files):
- iafd_a_1643373_sm1874.pdf
- iafd_a_1643373_sm8334.pdf
- iafd_a_1643373_sm8333.pdf
- iafd_a_1643373_sm8331.pdf
- iafd_a_1643373_sm8330.pdf
