# Supplementary material
Source: publisher figshare collection journal article supplement (https://tandf.figshare.com/articles/dataset/_/9221954)
Supplement: Supplementary file 4 [file 2 › iafd_a_1643373_sm1874.pdf]

## Appendix C: COREQ checklist

Developed from: Tong A, Sainsbury P, Craig J. Consolidated criteria for reporting qualitative research (COREQ): a 32-item checklist for interviews and focus groups. *Int J Qual in Health Care* 2007;19(6):349–57.

| No                                             | Item                                     | Guide questions/description                                                                                                                      | Reported in section(s)                                   |
|------------------------------------------------|------------------------------------------|--------------------------------------------------------------------------------------------------------------------------------------------------|----------------------------------------------------------|
| <b>Domain 1: Research team and reflexivity</b> |                                          |                                                                                                                                                  |                                                          |
| Personal Characteristics                       |                                          |                                                                                                                                                  |                                                          |
| 1.                                             | Interviewer/facilitator                  | Which author/s conducted the interview or focus group?                                                                                           | Materials and methods                                    |
| 2.                                             | Credentials                              | What were the researcher's credentials? <i>E.g. PhD, MD</i>                                                                                      | Acknowledgements and declarations                        |
| 3.                                             | Occupation                               | What was their occupation at the time of the study?                                                                                              | Acknowledgements and declarations                        |
| 4.                                             | Gender                                   | Was the researcher male or female?                                                                                                               | Authors                                                  |
| 5.                                             | Experience and training                  | What experience or training did the researcher have?                                                                                             | Acknowledgements and declarations                        |
| Relationship with participants                 |                                          |                                                                                                                                                  |                                                          |
| 6.                                             | Relationship established                 | Was a relationship established prior to study commencement?                                                                                      | Materials and methods, Acknowledgements and declarations |
| 7.                                             | Participant knowledge of the interviewer | What did the participants know about the researcher? <i>e.g. personal goals, reasons for doing the research</i>                                  | Materials and methods, Acknowledgements and declarations |
| 8.                                             | Interviewer characteristics              | What characteristics were reported about the interviewer/facilitator? <i>e.g. Bias, assumptions, reasons and interests in the research topic</i> | Acknowledgements and declarations                        |
| <b>Domain 2: study design</b>                  |                                          |                                                                                                                                                  |                                                          |
| Theoretical framework                          |                                          |                                                                                                                                                  |                                                          |
| 9.                                             | Methodological orientation and Theory    | What methodological orientation was stated to underpin the study? <i>e.g. grounded theory,</i>                                                   | Materials and methods                                    |

|                       |                              |                                                                                           |                                   |
|-----------------------|------------------------------|-------------------------------------------------------------------------------------------|-----------------------------------|
|                       |                              | <i>discourse analysis, ethnography, phenomenology, content analysis</i>                   |                                   |
| Participant selection |                              |                                                                                           |                                   |
| 10.                   | Sampling                     | How were participants selected? <i>e.g. purposive, convenience, consecutive, snowball</i> | Materials and methods             |
| 11.                   | Method of approach           | How were participants approached? <i>e.g. face-to-face, telephone, mail, email</i>        | Materials and methods             |
| 12.                   | Sample size                  | How many participants were in the study?                                                  | Materials and methods             |
| 13.                   | Non-participation            | How many people refused to participate or dropped out? Reasons?                           | Materials and methods             |
| Setting               |                              |                                                                                           |                                   |
| 14.                   | Setting of data collection   | Where was the data collected? <i>e.g. home, clinic, workplace</i>                         | Materials and methods             |
| 15.                   | Presence of non-participants | Was anyone else present besides the participants and researchers?                         | Materials and methods             |
| 16.                   | Description of sample        | What are the important characteristics of the sample? <i>e.g. demographic data, date</i>  | Materials and methods, Appendix D |
| Data collection       |                              |                                                                                           |                                   |
| 17.                   | Interview guide              | Were questions, prompts, guides provided by the authors? Was it pilot tested?             | Materials and methods, Appendix A |
| 18.                   | Repeat interviews            | Were repeat interviews carried out? If yes, how many?                                     | Materials and methods             |
| 19.                   | Audio/visual recording       | Did the research use audio or visual recording to collect the data?                       | Materials and methods             |
| 20.                   | Field notes                  | Were field notes made during and/or after the interview or focus group?                   | Materials and methods             |
| 21.                   | Duration                     | What was the duration of the interviews or focus group?                                   | Materials and methods             |
| 22.                   | Data saturation              | Was data saturation discussed?                                                            | Materials and methods             |
| 23.                   | Transcripts returned         | Were transcripts returned to participants for comment and/or correction?                  | Materials and methods             |

|                                        |                                |                                                                                                                                          |                                             |
|----------------------------------------|--------------------------------|------------------------------------------------------------------------------------------------------------------------------------------|---------------------------------------------|
| <b>Domain 3: analysis and findings</b> |                                |                                                                                                                                          |                                             |
| Data analysis                          |                                |                                                                                                                                          |                                             |
| 24.                                    | Number of data coders          | How many data coders coded the data?                                                                                                     | Materials and methods                       |
| 25.                                    | Description of the coding tree | Did authors provide a description of the coding tree?                                                                                    | Materials and methods                       |
| 26.                                    | Derivation of themes           | Were themes identified in advance or derived from the data?                                                                              | Materials and methods                       |
| 27.                                    | Software                       | What software, if applicable, was used to manage the data?                                                                               | Materials and methods                       |
| 28.                                    | Participant checking           | Did participants provide feedback on the findings?                                                                                       | Materials and methods                       |
| Reporting                              |                                |                                                                                                                                          |                                             |
| 29.                                    | Quotations presented           | Were participant quotations presented to illustrate the themes / findings? Was each quotation identified? <i>e.g. participant number</i> | Results, Discussion, Appendix E             |
| 30.                                    | Data and findings consistent   | Was there consistency between the data presented and the findings?                                                                       | Results, Discussion, Conclusion, Appendices |
| 31.                                    | Clarity of major themes        | Were major themes clearly presented in the findings?                                                                                     | Results, Discussion                         |
| 32.                                    | Clarity of minor themes        | Is there a description of diverse cases or discussion of minor themes?                                                                   | Results, Discussion                         |
